| <b>ID</b> | <b>Sample</b> | <b>Poly-N region</b> | <b>MID</b>  |
|-----------|---------------|----------------------|-------------|
| SSU 1A    | FU31.1        | NNNNN                | ACAGAGCA    |
| SSU 1B    | FU31.1        | NNNNN                | AATGCCAA    |
| SSU 1C    | FU31.2        | NNNNN                | AGCATTGA    |
| SSU 1D    | FU31.2        | NNNNN                | ATGAGAGA    |
| SSU 2A    | FU25          | NNNNN                | TGACTGATT   |
| SSU 2B    | FU25          | NNNNN                | TTTCGCATG   |
| SSU 3A    | FU28          | NNNNN                | TACACTGTC   |
| SSU 3B    | FU28          | NNNNN                | TCGTAAGTA   |
| SSU 4A    | FU34          | NNNNN                | CAATCGTCAT  |
| SSU 4B    | FU34          | NNNNN                | CGTATCACGT  |
| SSU 5A    | FU37          | NNNNN                | CCCTATACTT  |
| SSU 5B    | FU37          | NNNNN                | CTGAGATCCT  |
| SSU 6A    | Uni Pond      | NNNNN                | GGATTGTGGTA |
| SSU 6B    | Uni Pond      | NNNNN                | GTTAGCTGCAA |
| SSU 7A    | Bog Soil      | NNNNN                | GCGTAACGTAG |
| SSU 7B    | Bog Soil      | NNNNN                | GAGTCAAGATG |
