# Supplementary material for: AmpliconDuo: A Split-Sample Filtering Protocol for High-Throughput Amplicon Sequencing of Microbial Communities
Source: PubMed Central journal article supplement (PMC4629888; doi:10.1371/journal.pone.0141590), 2015-11-02
Supplement: pone.0141590.s008.pdf [file pone.0141590.s008.pdf]

| sample  | ampliconsA | readsA | ampliconsB | readsB |
|---------|------------|--------|------------|--------|
| BogSoil | 58.21      | 3.68   | 66.68      | 8.34   |
| FU25    | 63.48      | 6.25   | 68.15      | 6.48   |
| FU28    | 64.52      | 5.09   | 63.55      | 4.55   |
| Fu31.2  | 63.98      | 5.16   | 63.00      | 4.99   |
| Fu31.1  | 63.69      | 4.89   | 61.90      | 4.34   |
| FU34    | 54.13      | 3.23   | 65.55      | 3.70   |
| FU37    | 62.99      | 2.30   | 60.87      | 2.06   |
| UniPond | 55.29      | 1.56   | 57.43      | 1.73   |
| Pro1    | 84.41      | 32.26  | 85.70      | 32.04  |
| Pro2    | 82.53      | 29.06  | 88.27      | 40.14  |
| Pro3    | 77.36      | 19.84  | 86.60      | 24.98  |
| Pro4    | 82.81      | 27.43  | 84.43      | 26.42  |
