# Supplementary material for: AmpliconDuo: A Split-Sample Filtering Protocol for High-Throughput Amplicon Sequencing of Microbial Communities
Source: PubMed Central journal article supplement (PMC4629888; doi:10.1371/journal.pone.0141590), 2015-11-02
Supplement: pone.0141590.s009.pdf [file pone.0141590.s009.pdf]

|           | #reads AmpDuo | #reads no Filter | #OTUs AmpDuo | #OTUs no Filter |
|-----------|---------------|------------------|--------------|-----------------|
| BogSoil A | 38699         | 40053            | 510          | 1255            |
| BogSoil B | 40317         | 43763            | 510          | 1548            |
| FU25 A    | 69871         | 74517            | 2303         | 6281            |
| FU25 B    | 85725         | 91644            | 2303         | 7194            |
| FU28 A    | 150619        | 158673           | 3551         | 9958            |
| FU28 B    | 164750        | 172597           | 3551         | 9722            |
| FU31.1 A  | 143196        | 151078           | 3757         | 10406           |
| FU31.1 B  | 150524        | 157805           | 3757         | 9915            |
| FU31.2 A  | 106591        | 112873           | 2955         | 8313            |
| FU31.2 B  | 103562        | 109385           | 2955         | 8038            |
| FU34 A    | 228694        | 236391           | 5671         | 12373           |
| FU34 B    | 358170        | 371874           | 5671         | 16276           |
| FU37 A    | 57442         | 61633            | 1915         | 5535            |
| FU37 B    | 56337         | 60130            | 1915         | 5230            |
| UniPond A | 150018        | 152327           | 1662         | 3690            |
| UniPond B | 148975        | 151566           | 1662         | 3886            |
